# Supplementary material for: shRNAs Targeting a Common KCNQ1 Variant Could Alleviate Long-QT1 Disease Severity by Inhibiting a Mutant Allele
Source: MDPI journal article supplement (doi:10.3390/ijms23074053), 2022-04-06
Supplement: s1 [file s1]

Lucía Cócera-Ortega et al. shRNAs Targeting a Common *KCNQ1* Variant Could Alleviate Long-QT1 Disease Severity by Inhibiting a Mutant Allele. *Int. J. Mol. Sci.* 2022

## **Supplemental tables and figures**

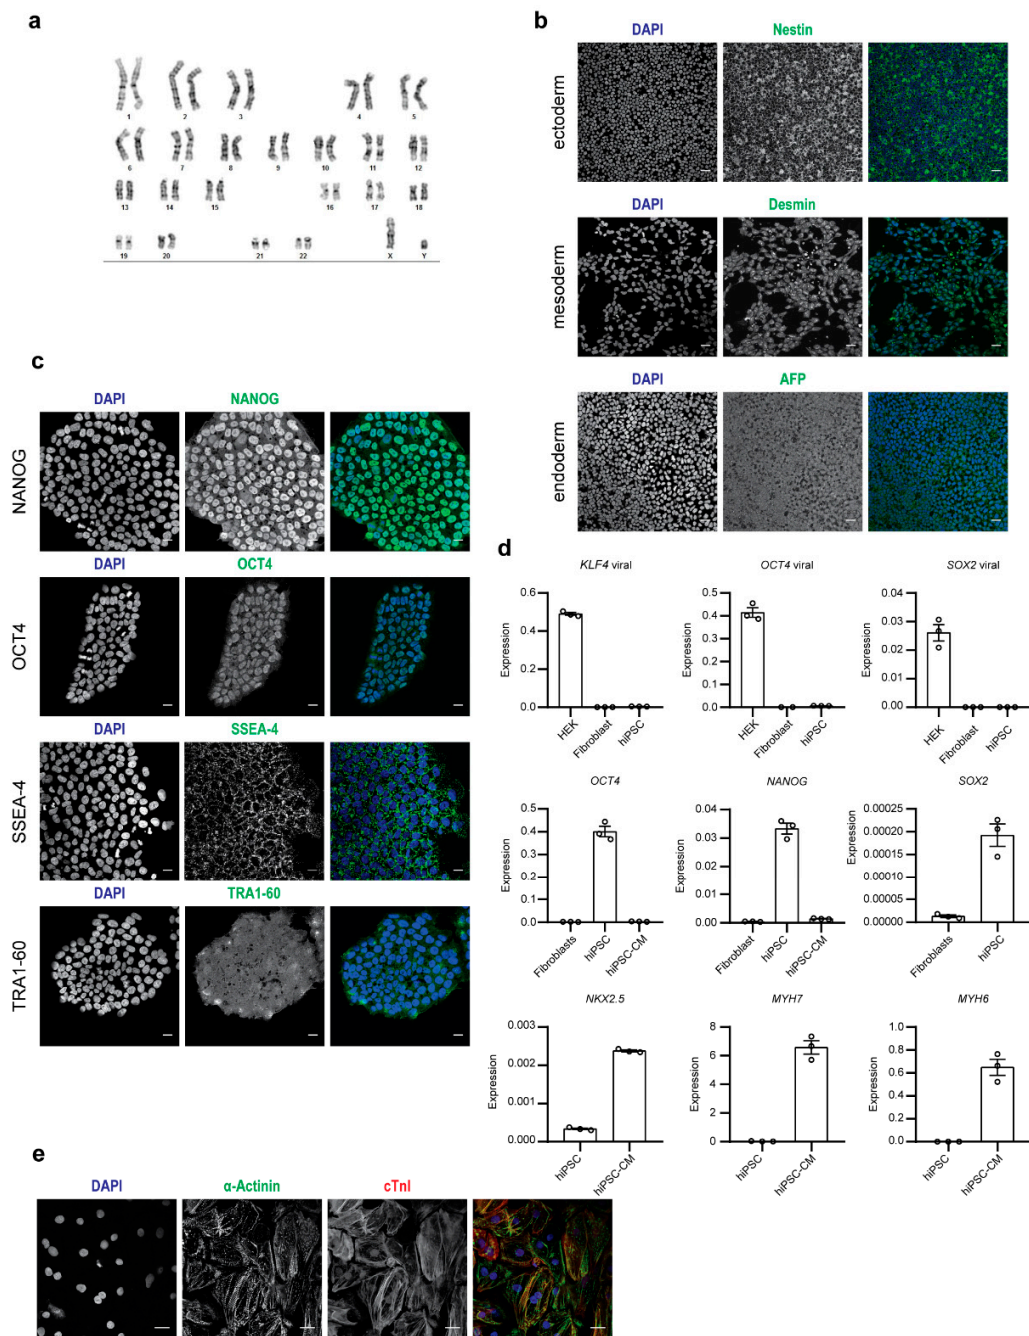

**Figure S1. Characterization of Line 2.** **a)** Karyotype analysis of hiPSCs of Line 2. **b)** Immunofluorescence after in vitro 3 lineage differentiation. Scale bars 20  $\mu$ m. **c)** Immunofluorescence of pluripotency markers in undifferentiated hiPSCs. Scale bars 20  $\mu$ m. **d)** Downregulation of viral genes in hiPSCs after induction of pluripotency with HEK cells transfected with the viral plasmids as positive control, expression of pluripotency markers OCT4, NANOG and SOX2 in undifferentiated hiPSCs and expression of cardiomyocyte markers NKX2.5, MYH7 and MYH6 in hiPSC-CMs measured by RT-qPCR. Error bars indicate SEM. **e)** Immunofluorescence of cardiomyocyte markers in hiPSC-CMs. Scale bars 20  $\mu$ m. For all immunofluorescence pictures the separate panels

on the left are merged into the rightmost panel with colour coding as indicated above the separate panels. Characterization of line 1 is included elsewhere (Tijssen et al. manuscript in draft).

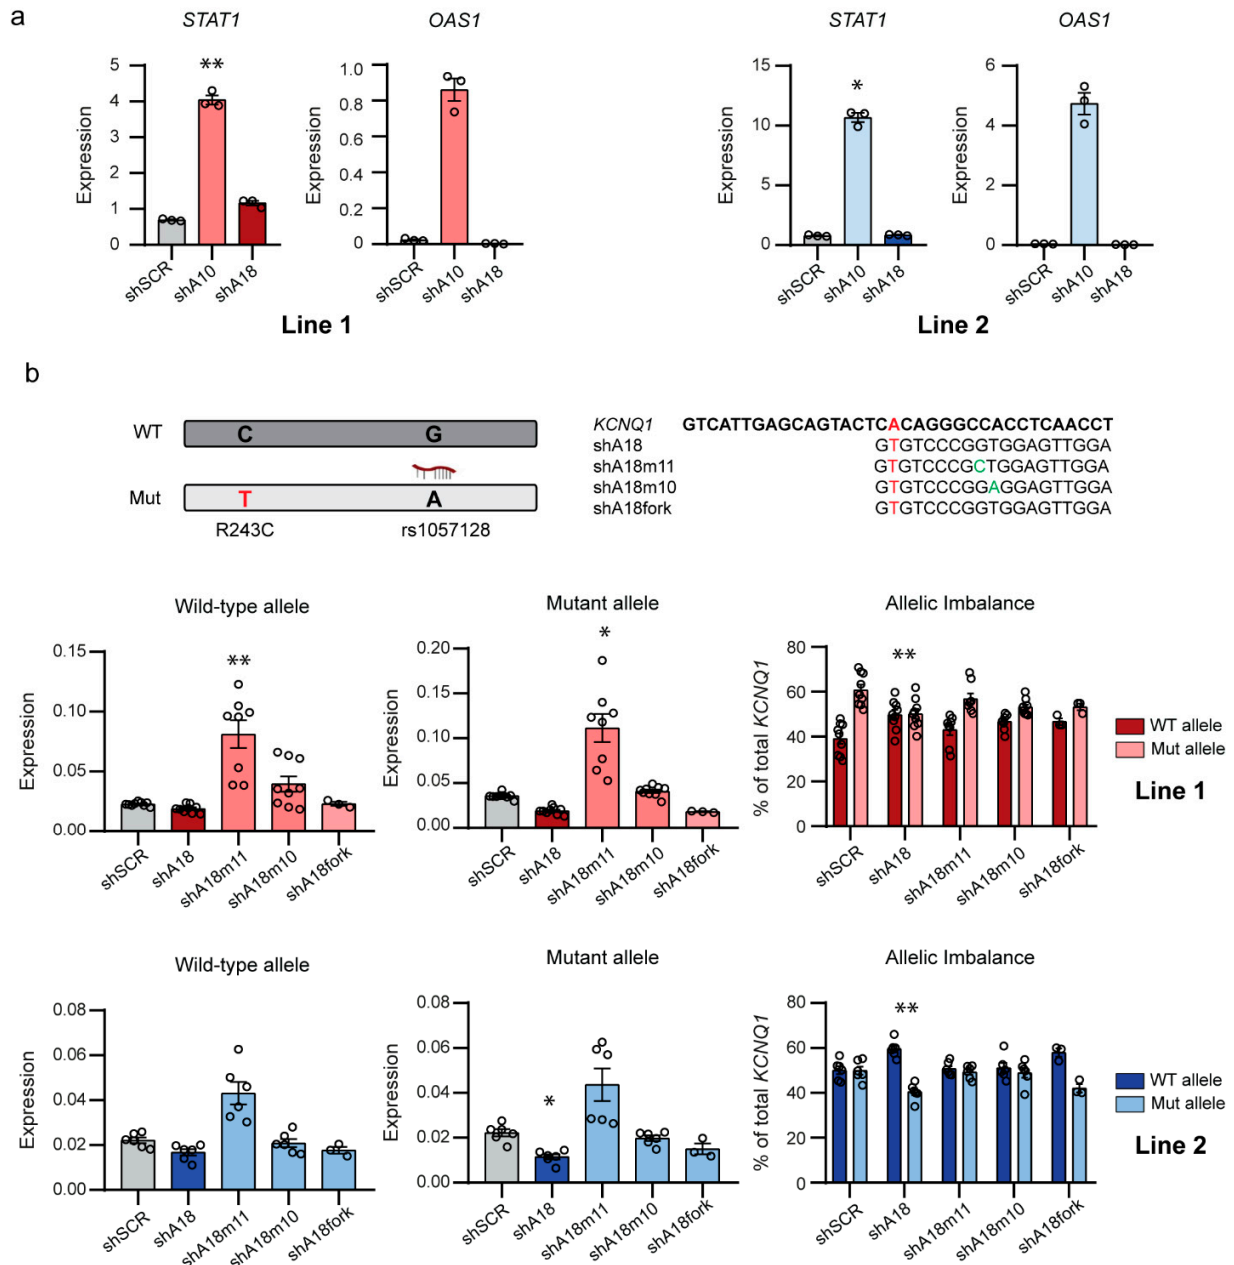

**Figure S2. Introduction of additional mismatches does not improve allele-specificity of shRNAs targeting the A allele of SNP rs1057128 on the mutant *KCNQ1* allele.** **a)** Relative mRNA expression of interferon response genes *STAT1* and *OAS1* for the most efficient shRNAs targeting the A allele of rs1057128 in hiPSC-CMs of Line 1 (red; left) and Line 2 (blue; right). **b)** Top, schematic representation of the shRNAs targeting the A allele of rs1057128 on the mutant *KCNQ1* allele with the mismatch positions indicated (original mismatch in red and additional mismatches in green). Middle and bottom, allele-specific relative mRNA expression of the wild-type and mutant *KCNQ1* alleles

(left two panels) and the allelic expression of the wild-type and mutant *KCNQ1* alleles presented as % of total *KCNQ1* expression (right panel). In red hiPSC-CMs of Line 1 (middle, n=3-9) and in blue hiPSC-CMs of Line 2 (bottom, n=3-6). \* $P < 0.05$ ; \*\* $P < 0.025$  compared to shSCR negative control; error bars indicate SEM.

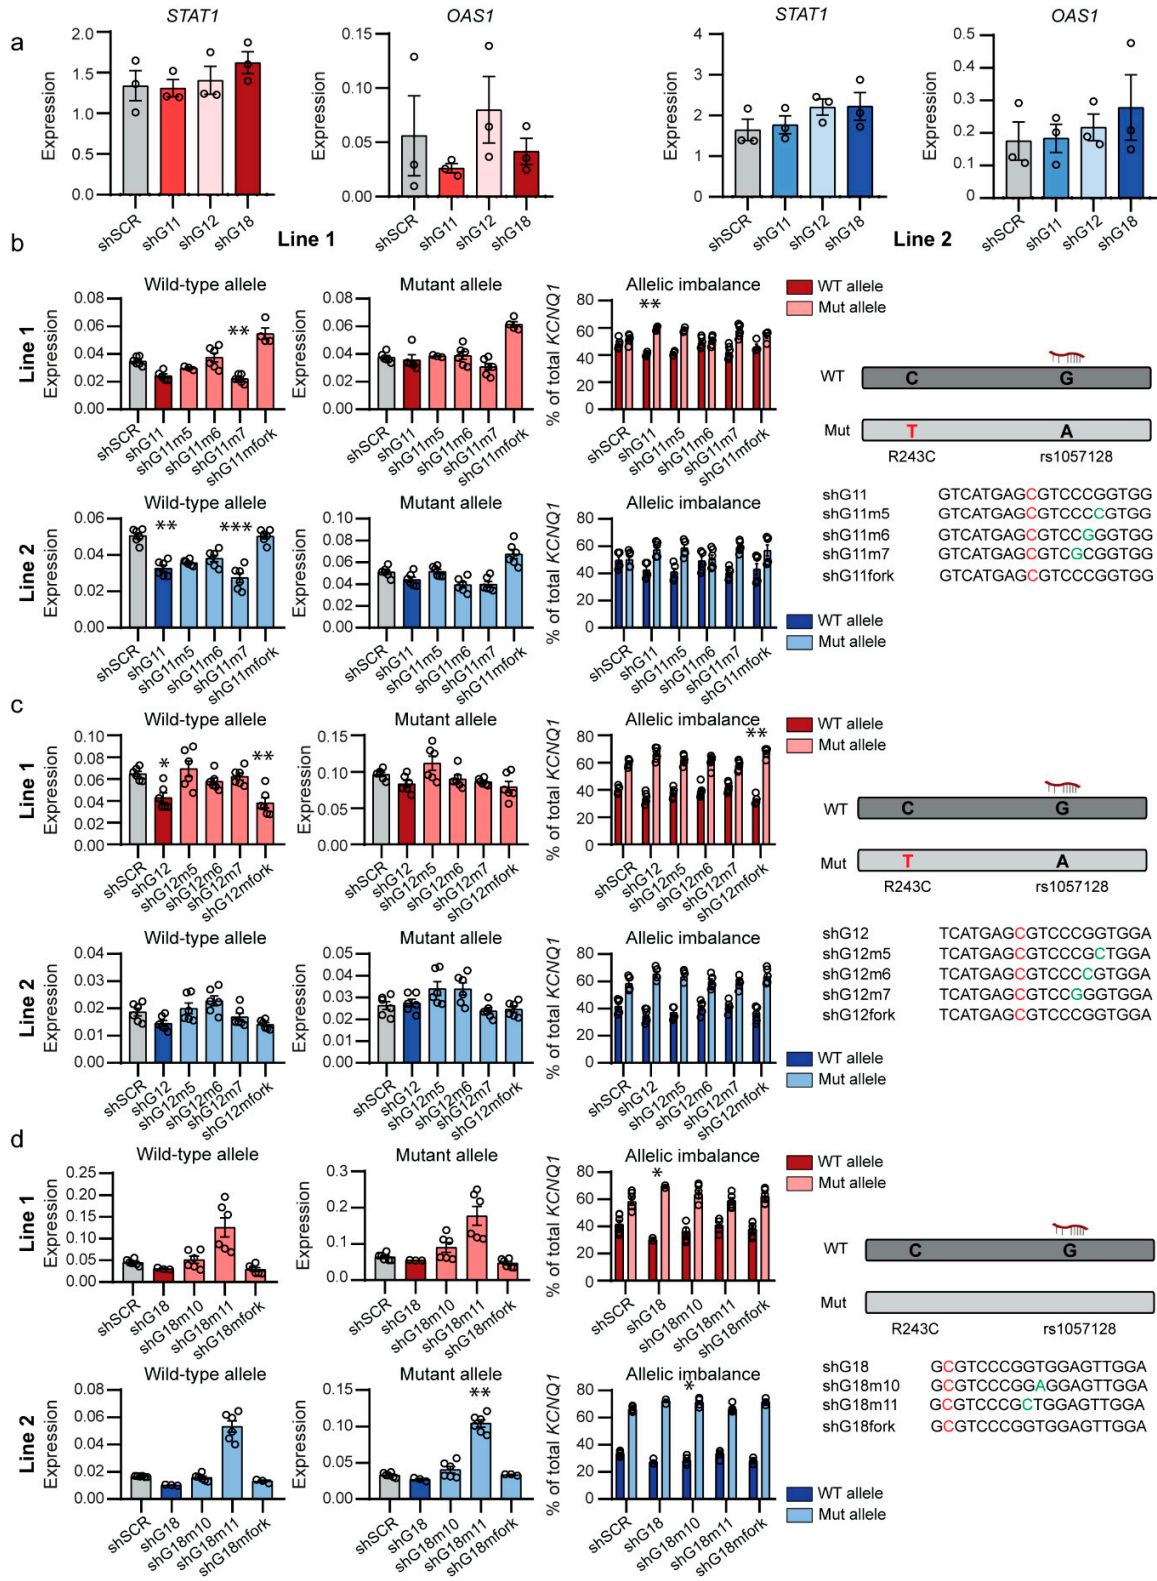

**Figure S3. Introduction of additional mismatches does not improve allele-specificity of shRNAs targeting the G allele of SNP rs1057128 on the wild-type *KCNQ1* allele.** **a)** Relative mRNA expression of interferon response genes *STAT1* and *OAS1* for the most efficient shRNAs targeting the G allele of rs1057128 in hiPSC-CMs of Line 1 (red; left) and Line 2 (blue; right). **b-d)** Right, schematic representation of the shRNAs targeting the G allele of rs1057128 on the wild-type *KCNQ1* allele with the mismatch positions indicated (original mismatch in red and additional mismatches in green). Left, allele-specific relative mRNA expression of the wild-type and mutant *KCNQ1* alleles and the allelic expression of the wild-type and mutant *KCNQ1* alleles presented as % of total *KCNQ1* expression. In red hiPSC-CMs of Line 1 (top; n=3-9) and in blue hiPSC-CMs of Line 2 (bottom; n=3-6). \* $P < 0.05$ ; \*\* $P < 0.025$ ; \*\*\* $P < 0.001$  compared to shSCR negative control; error bars indicate SEM.

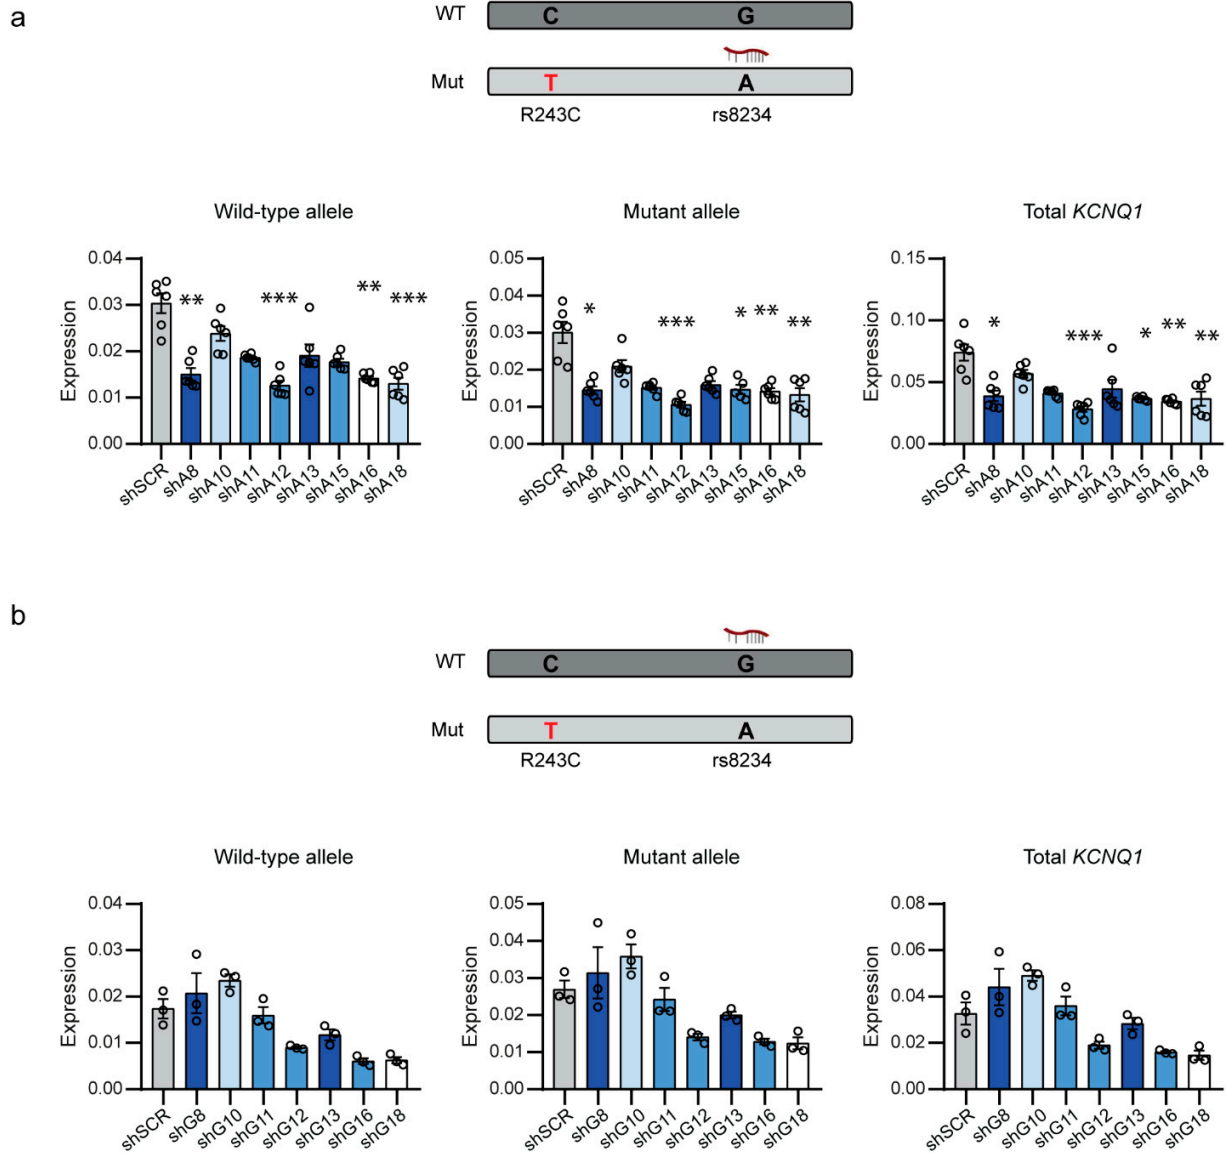

**Figure S4. Allele specific shRNAs targeting SNP rs8234 in the 3'UTR of *KCNQ1*.** **a)** Top, representation of the targeting of the A allele of rs8234 on the mutant *KCNQ1* allele in hiPSC-CMs of Line 2. Bottom, relative allele-specific expression of the wild-type and mutant *KCNQ1* allele and total *KCNQ1* (n=6). **b)** Top, representation of the targeting of the G allele of rs8234 on the wild-type *KCNQ1* allele. Bottom, relative allele-specific expression of the wild-type and mutant *KCNQ1* allele and total *KCNQ1* measured by qRT-PCR (n=3). \* $P < 0.05$ ; \*\* $P < 0.025$ ; \*\*\* $P < 0.001$  compared to shSCR negative control; error bars indicate SEM.

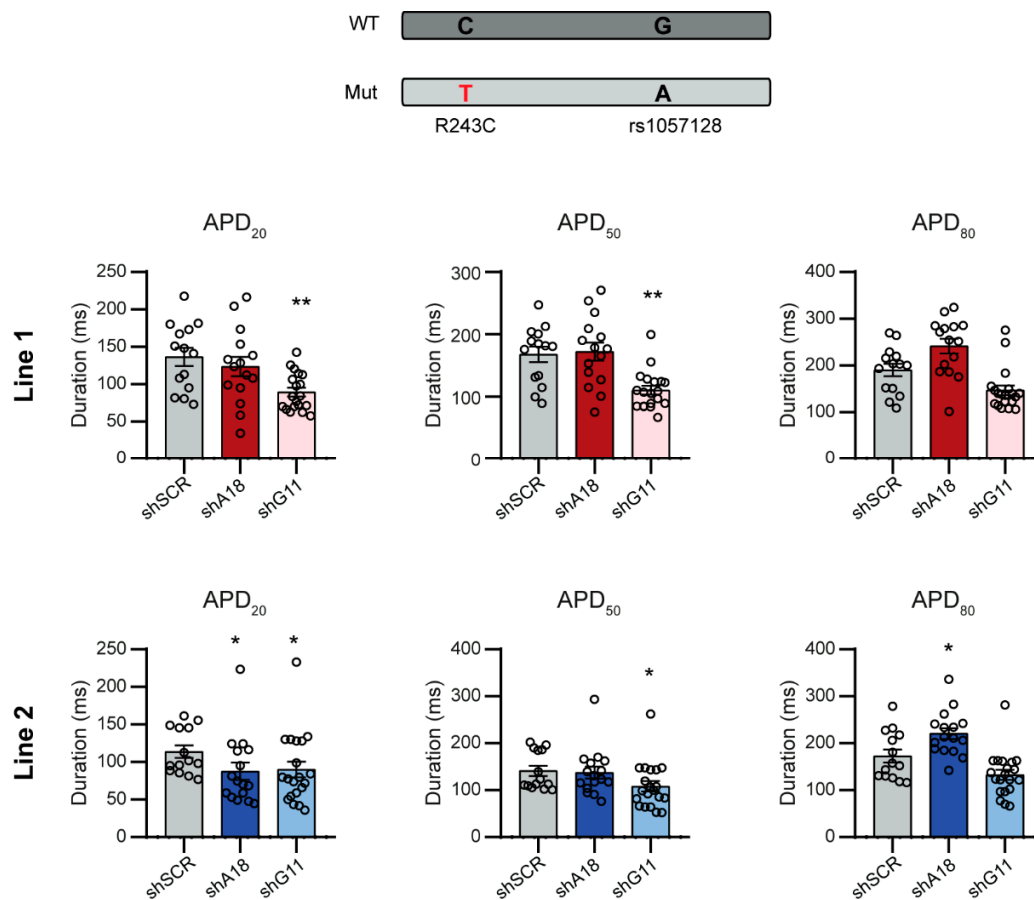

**Figure S5. Action potential duration is affected by shifts in allelic balance.** Schematic representation of the SNP and mutation in *KCNQ1* (top) and action potential duration at 20, 50 or 80% of repolarization (APD<sub>20</sub>, APD<sub>50</sub>, and APD<sub>80</sub>, respectively) of optical action potentials derived from ArcLight fluorescence changes in hiPSC-CMs from Line 1 (red) or Line 2 (blue) treated with either negative control shSCR, shA18 targeting the mutant *KCNQ1* allele or shG11 targeting the wild-type *KCNQ1* allele stimulated at 2 Hz. \* $P < 0.05$ ; \*\* $P < 0.025$  compared to shSCR negative control; error bars indicate SEM.



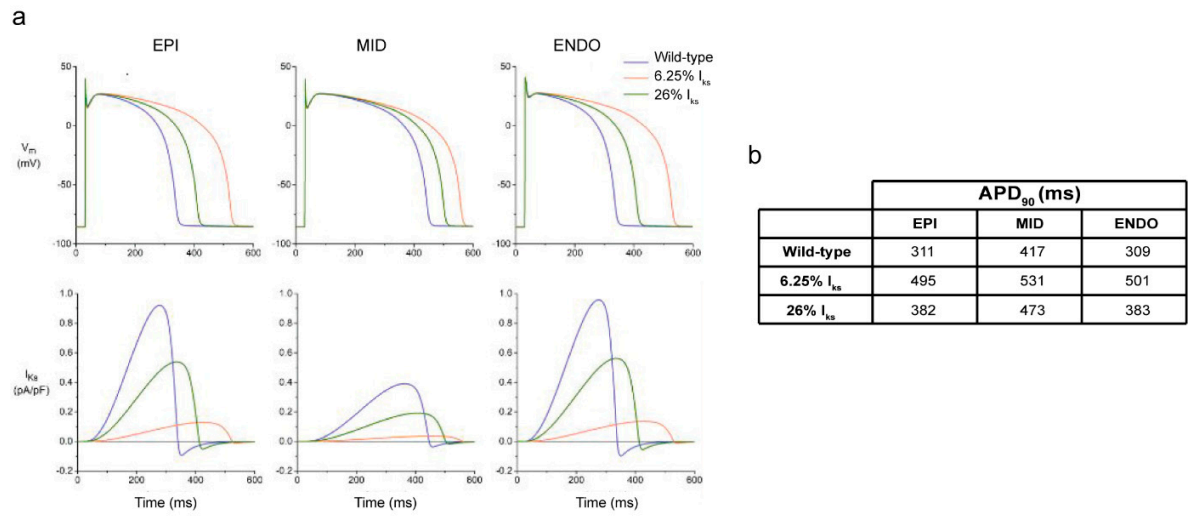

**Figure S6. Effects of changes in the slow delayed rectifier potassium current ( $I_{Ks}$ ) in a human ventricular cell model. a)** Membrane potential ( $V_m$ ; top) and associated  $I_{Ks}$  (bottom) at 1 Hz stimulation under wild-type conditions, upon reduction of functional  $K_v7.1$  channels to 1/16<sup>th</sup> as expected when both alleles are equally expressed (6.25%) or to 26% as expected when the mutant *KCNQ1* allele is downregulated by 60%. **b)** Associated APD<sub>90</sub> values in the epicardial (EPI), midmyocardial (MID) and endocardial (ENDO) versions of the human cardiomyocyte model.

**Table S1**

| Antibody                           | Supplier                                   | Species | Dilution | Cat. number |
|------------------------------------|--------------------------------------------|---------|----------|-------------|
| <b>OCT-4</b>                       | STEMCELL Technologies<br>Vancouver, Canada | Mouse   | 1:200    | 60093       |
| <b>SSEA-4</b>                      | STEMCELL Technologies<br>Vancouver, Canada | Mouse   | 1:100    | 60062       |
| <b>Tra1-60</b>                     | STEMCELL Technologies<br>Vancouver, Canada | Mouse   | 1:100    | 60064       |
| <b>NANOG</b>                       | Peprtech<br>Rocky Hill, NJ,USA             | Rabbit  | 1:200    | 500-P236    |
| <b><math>\alpha</math>-Actinin</b> | Abcam<br>Cambridge, UK                     | Rabbit  | 1:500    | 68167       |
| <b>cTnl</b>                        | HyTest<br>Turku, Finland                   | Goat    | 1:400    | 4T21/2      |

|                                        |                                               |        |           |           |
|----------------------------------------|-----------------------------------------------|--------|-----------|-----------|
| <b>Nestin</b>                          | STEMCELL<br>Technologies<br>Vancouver, Canada | Mouse  | 1:1000    | 60091     |
| <b>AFP</b>                             | ThermoFisher<br>Rockford, IL, USA             | Rabbit | 1:100     | PA5-16658 |
| <b>Desmin</b>                          | ThermoFisher<br>Rockford, IL, USA             | Rabbit | 1:100     | PA5-16705 |
| <b>Alexa fluor 488<br/>Anti-rabbit</b> | Invitrogen<br>Eugene, OR, USA                 | Goat   | 1:250 ICC | A32731    |
| <b>Alexa fluor 488<br/>Anti-mouse</b>  | Invitrogen<br>Eugene, OR, USA                 | Goat   | 1:250 ICC | A32731    |
| <b>Alexa fluor 488<br/>Anti-rabbit</b> | Invitrogen<br>Eugene, OR, USA                 | Donkey | 1:250 ICC | A10037    |
| <b>Alexa fluor 647<br/>Anti-goat</b>   | Invitrogen<br>Eugene, OR, USA                 | Donkey | 1:250 ICC | A32814    |

Table S2

| Targeted SNP     | Name shRNA | Oligonucleotides for cloning of shRNAs<br>(upper forward and lower reverse oligonucleotide) |
|------------------|------------|---------------------------------------------------------------------------------------------|
| <b>rs1057128</b> | shA18      | ccggaaCACAGGGCCACCTCAACCTtcaagacAGGTTGAGGTGGCCCTGTGtttttttg                                 |
|                  |            | aattcaaaaaaaCACAGGGCCACCTCAACCTgtcttgaAGGTTGAGGTGGCCCTGTGtt                                 |
| <b>rs1057128</b> | shA10      | ccggaaGCAGTACTCACAGGGCCACtcaagacGTGGCCCTGTGAGTACTGcttttttg                                  |
|                  |            | aattcaaaaaaaGCAGTACTCACAGGGCCACgtcttgaGTGGCCCTGTGAGTACTGctt                                 |
| <b>rs1057128</b> | shA13      | ccggaaGTACTCACAGGGCCACCTCtcaagacGAGGTGGCCCTGTGAGTACTtttttttg                                |
|                  |            | aattcaaaaaaaGTACTCACAGGGCCACCTCgtcttgaGAGGTGGCCCTGTGAGTACTt                                 |
| <b>rs1057128</b> | shA15      | ccggaaACTCACAGGGCCACCTCAAtcaagacTTGAGGTGGCCCTGTGAGTtttttttg                                 |
|                  |            | aattcaaaaaaaACTCACAGGGCCACCTCAAgcttgaTTGAGGTGGCCCTGTGAGTtt                                  |
| <b>rs1057128</b> | shA16      | ccggaaCTCACAGGGCCACCTCAACtcaagacGTTGAGGTGGCCCTGTGAGTtttttttg                                |
|                  |            | aattcaaaaaaaCTCACAGGGCCACCTCAACgtcttgaGTTGAGGTGGCCCTGTGAGtt                                 |
| <b>rs1057128</b> | shG18      | ccggaaCGCAGGGCCACCTCAACCTtcaagacAGGTTGAGGTGGCCCTGCGtttttttg                                 |
|                  |            | aattcaaaaaaaCGCAGGGCCACCTCAACCTgtcttgaAGGTTGAGGTGGCCCTGCGtt                                 |
| <b>rs1057128</b> | shG10      | ccggaaGCAGTACTCGCAGGGCCACtcaagacGTGGCCCTGCGAGTACTGcttttttg                                  |

|                  |           |                                                             |
|------------------|-----------|-------------------------------------------------------------|
|                  |           | aattcaaaaaaaGCAGTACTCGCAGGGCCACGtcttgaGTGGCCCTGCGAGTACTGctt |
| <b>rs1057128</b> | shG11     | ccggaaCAGTACTCGCAGGGCCACctcaagacGGTGGCCCTGCGAGTACTGtttttttg |
|                  |           | aattcaaaaaaaCAGTACTCGCAGGGCCACCgtcttgaGGTGGCCCTGCGAGTACTGtt |
| <b>rs1057128</b> | shG12     | ccggaaAGTACTCGCAGGGCCACCTcaagacAGGTGGCCCTGCGAGTACTtttttttg  |
|                  |           | aattcaaaaaaaAGTACTCGCAGGGCCACCTgtcttgaAGGTGGCCCTGCGAGTACTtt |
| <b>rs1057128</b> | shG16     | ccggaaCTCGCAGGGCCACCTCAACtcaagacGTTGAGGTGGCCCTGCGAGtttttttg |
|                  |           | aattcaaaaaaaCTCGCAGGGCCACCTCAACgtcttgaGTTGAGGTGGCCCTGCGAGtt |
| <b>rs1057128</b> | shG11m5   | ccggaaCAGTACTCGCAGGGGCACctcaagacGGTGCCCTGCGAGTACTGtttttttg  |
|                  |           | aattcaaaaaaaCAGTACTCGCAGGGGCACCgtcttgaGGTGCCCTGCGAGTACTGtt  |
| <b>rs1057128</b> | shG11m6   | ccggaaCAGTACTCGCAGGGCCACctcaagacGGTGGCCCTGCGAGTACTGtttttttg |
|                  |           | aattcaaaaaaaCAGTACTCGCAGGGCCACCgtcttgaGGTGGCCCTGCGAGTACTGtt |
| <b>rs1057128</b> | shG11m7   | ccggaaCAGTACTCGCAGGCCACctcaagacGGTGGCGCTGCGAGTACTGtttttttg  |
|                  |           | aattcaaaaaaaCAGTACTCGCAGGCCACCgtcttgaGGTGGCGCTGCGAGTACTGtt  |
| <b>rs1057128</b> | shG11fork | ccggaaCAGTACTCGCAGGGCCATatcaagacGGTGGCCCTGCGAGTACTGtttttttg |
|                  |           | aattcaaaaaaaCAGTACTCGCAGGGCCACCgtcttgaTATGGCCCTGCGAGTACTGtt |
| <b>rs1057128</b> | shG12m5   | ccggaaAGTACTCGCAGGGCGACCTcaagacAGGTGCGCCTGCGAGTACTtttttttg  |
|                  |           | aattcaaaaaaaAGTACTCGCAGGGCGACCTgtcttgaAGGTGCGCCTGCGAGTACTtt |
| <b>rs1057128</b> | shG12m6   | ccggaaAGTACTCGCAGGGGCACCTcaagacAGGTGCCCTGCGAGTACTtttttttg   |
|                  |           | aattcaaaaaaaAGTACTCGCAGGGGCACCTgtcttgaAGGTGCCCTGCGAGTACTtt  |
| <b>rs1057128</b> | shG12m7   | ccggaaAGTACTCGCAGGGCCACCTcaagacAGGTGGGCCTGCGAGTACTtttttttg  |
|                  |           | aattcaaaaaaaAGTACTCGCAGGGCCACCTgtcttgaAGGTGGGCCTGCGAGTACTtt |
| <b>rs1057128</b> | shG12fork | ccggaaAGTACTCGCAGGGCCACTatcaagacAGGTGGCCCTGCGAGTACTtttttttg |
|                  |           | aattcaaaaaaaAGTACTCGCAGGGCCACCTgtcttgaTAGTGGCCCTGCGAGTACTtt |
| <b>rs1057128</b> | shG18m10  | ccggaaCGCAGGGCCTCCTCAACCTcaagacAGGTTGAGGAGGCCCTGCGtttttttg  |
|                  |           | aattcaaaaaaaCGCAGGGCCTCCTCAACCTgtcttgaAGGTTGAGGAGGCCCTGCGtt |

|                  |            |                                                                                                                             |
|------------------|------------|-----------------------------------------------------------------------------------------------------------------------------|
| <b>rs1057128</b> | shG18m11   | ccggaaCGCAGGGCGACCTCAACCTtcaagacAGGTTGAGGTGCGCCTGCGtttttttg<br>aattcaaaaaaaCGCAGGGCGACCTCAACCTgtcttgaAGGTTGAGGTGCGCCTGCGtt  |
| <b>rs1057128</b> | shG18 fork | ccggaaCGCAGGGCCACCTCAACTAtcaagacAGGTTGAGGTGGCCCTGCGtttttttg<br>aattcaaaaaaaCGCAGGGCCACCTCAACCTgtcttgaTAGTTGAGGTGGCCCTGCGtt  |
| <b>rs1057128</b> | shA18m11   | ccggaaCACAGGGCGACCTCAACCTtcaagacAGGTTGAGGTGCGCCTGTGtttttttg<br>aattcaaaaaaaCACAGGGCGACCTCAACCTgtcttgaAGGTTGAGGTGCGCCTGTGtt  |
| <b>rs1057128</b> | shA18m10   | ccggaaCACAGGGCCTCCTCAACCTtcaagacAGGTTGAGGAGGCCCTGTGtttttttg<br>aattcaaaaaaaCACAGGGCCTCCTCAACCTgtcttgaAGGTTGAGGAGGCCCTGTGtt  |
| <b>rs1057128</b> | shA18 fork | ccggaaCACAGGGCCACCTCAACTAtcaagacAGGTTGAGGTGGCCCTGTGtttttttg<br>aattcaaaaaaaCACAGGGCCACCTCAACCTgtcttgaTAGTTGAGGTGGCCCTGTGtt  |
| <b>rs8234</b>    | shA8       | ccggaaCTGGGCATTACATCGCATAtcaagacTATGCGATGTAATGCCAGtttttttg<br>aattcaaaaaaaCTGGGCATTACATCGCATAgcttgaTATGCGATGTAATGCCAGtt     |
| <b>rs8234</b>    | shA10      | ccggaaGGGCATTACATCGCATAGAtcaagacTCTATGCGATGTAATGCCtttttttg<br>aattcaaaaaaaGGGCATTACATCGCATAGAgcttgaTCTATGCGATGTAATGCCtt     |
| <b>rs8234</b>    | shA11      | ccggaaGGCATTACATCGCATAGAAAtcaagacTTCTATGCGATGTAATGCCtttttttg<br>aattcaaaaaaaGGCATTACATCGCATAGAAgcttgaTTCTATGCGATGTAATGCCtt  |
| <b>rs8234</b>    | shA12      | ccggaaGCATTACATCGCATAGAAAtcaagacTTTCTATGCGATGTAATGCTtttttttg<br>aattcaaaaaaaGCATTACATCGCATAGAAAgcttgaTTTCTATGCGATGTAATGCTtt |
| <b>rs8234</b>    | shA13      | ccggaaCATTACATCGCATAGAAATtcaagacATTTCTATGCGATGTAATGtttttttg<br>aattcaaaaaaaCATTACATCGCATAGAAATgtcttgaATTTCTATGCGATGTAATGtt  |
| <b>rs8234</b>    | shA15      | ccggaaTTACATCGCATAGAAATCAAtcaagacTGATTCTATGCGATGTAAtttttttg<br>aattcaaaaaaaTTACATCGCATAGAAATCAgtcttgaTGATTCTATGCGATGTAAtt   |
| <b>rs8234</b>    | shA16      | ccggaaTACATCGCATAGAAATCAAtcaagacTTGATTCTATGCGATGTAtttttttg<br>aattcaaaaaaaTACATCGCATAGAAATCAAgcttgaTTGATTCTATGCGATGTAtt     |
| <b>rs8234</b>    | shA18      | ccggaaCATCGCATAGAAATCAATAtcaagacTATTGATTCTATGCGATGtttttttg                                                                  |

|               |       |                                                              |
|---------------|-------|--------------------------------------------------------------|
|               |       | aattcaaaaaaCATCGCATAGAAATCAATAgcttgaTATTGATTCTATGCGATGtt     |
| <b>rs8234</b> | shG8  | ccggaaCTGGGCATTACGTGCGATAtcaagacTATGCGACGTAATGCCAGtttttttg   |
|               |       | aattcaaaaaaCTGGGCATTACGTGCGATAgcttgaTATGCGACGTAATGCCAGtt     |
| <b>rs8234</b> | shG10 | ccggaaGGGCATTACGTGCGATAGAtcaagacTCTATGCGACGTAATGCCtttttttg   |
|               |       | aattcaaaaaaGGGCATTACGTGCGATAGAgcttgaTCTATGCGACGTAATGCCtt     |
| <b>rs8234</b> | shG11 | ccggaaGGCATTACGTGCGATAGAAAtcaagacTTCTATGCGACGTAATGCCtttttttg |
|               |       | aattcaaaaaaGGCATTACGTGCGATAGAAgcttgaTTCTATGCGACGTAATGCCtt    |
| <b>rs8234</b> | shG12 | ccggaaGCATTACGTGCGATAGAAAtcaagacTTTCTATGCGACGTAATGCtttttttg  |
|               |       | aattcaaaaaaGCATTACGTGCGATAGAAAgcttgaTTTCTATGCGACGTAATGCtt    |
| <b>rs8234</b> | shG13 | ccggaaCATTACGTGCGATAGAAATtcaagacATTTCTATGCGACGTAATGtttttttg  |
|               |       | aattcaaaaaaCATTACGTGCGATAGAAATgtcttgaATTTCTATGCGACGTAATGtt   |
| <b>rs8234</b> | shG16 | ccggaaTACGTGCGATAGAAATCAAtcaagacTTGATTCTATGCGACGTAAttttttg   |
|               |       | aattcaaaaaaTACGTGCGATAGAAATCAAgcttgaTTGATTCTATGCGACGTAtt     |
| <b>rs8234</b> | shG18 | ccggaaCGTCGCATAGAAATCAATAtcaagacTATTGATTCTATGCGACGtttttttg   |
|               |       | aattcaaaaaaCGTCGCATAGAAATCAATAgcttgaTATTGATTCTATGCGACGtt     |

**Table S3**

| PCR primers        |                       |                           |                       |
|--------------------|-----------------------|---------------------------|-----------------------|
| Gene               | Forward               | Reverse                   | Annealing temperature |
| <b>KCNQ1_wt</b>    | TGAGGATGCTACACGTCGACC | AGCCGATGTACAGGGTGGTTATC   | 66                    |
| <b>KCNQ1_mut</b>   | TGAGGATGCTACACGTCGACT | AGCCGATGTACAGGGTGGTTATC   | 66                    |
| <b>KCNQ1_total</b> | TCCTGAGGATGCTACACGTC  | AGCCGATGTACAGGGTGGTTATC   | 66                    |
| <b>STAT1</b>       | ATCACATTACATGGGTGGAGC | ACAGATACTTCAGGGGATTCTCAGG | 60                    |
| <b>OAS1</b>        | CATCCGCCTAGTCAAGCACT  | AAGACCGTCCGAAATCCCTGG     | 60                    |

|                          |                         |                        |    |
|--------------------------|-------------------------|------------------------|----|
| <b><i>GAPDH</i></b>      | ACCCACTCCTCCACCTTTGAC   | ACCCTGTTGCTGTAGCCAAATT | 60 |
| <b><i>HPRT</i></b>       | TGACACTGGCAAAACAATGCA   | GGTCCTTTTCACCAGCAAGCT  | 60 |
| <b><i>TBP</i></b>        | GCTCACCCACCAACAATTTAG   | TCTGCTCTGACTTTAGCACCTG | 60 |
| <b><i>NANOG</i></b>      | AGAATAGCAATGGTGTGACGCAG | TGGATGTTCTGGGTCTGGTTGC | 60 |
| <b><i>OCT4</i></b>       | TGGTTGGAGGGAAGGTGAAG    | TGTCTATCTACTGTGTCCCAG  | 60 |
| <b><i>OCT4_viral</i></b> | TGTACTCCTCGGTCCCTTTC    | CAGGTGGGGTCTTTCATTC    | 63 |
| <b><i>SOX2</i></b>       | ACCAATCCCATCCACACTCAC   | TCTATACAAGGTCCATTCCCCC | 63 |
| <b><i>SOX2_viral</i></b> | ATCCCAGTGTGGTGGTACG     | AAGGCATTCATGGGCCGCTTG  | 63 |
| <b><i>MLC2V</i></b>      | ACAACTGACACCAACACCTGC   | AGTCCAAGTTGCCAGTCACGTC | 63 |
| <b><i>NKX2.5</i></b>     | TCTATCCACGTGCCTACAGC    | AGAAAGTCAGGCTGGCTCAAG  | 63 |
| <b><i>KLF4_viral</i></b> | CTGCGGCAAAACCTACACAAA   | TTATCGTCGACCACTGTGCTGG | 63 |
| <b><i>MYH6</i></b>       | ACCTGTCCAAGTCCGCAAGG    | TTACAGGTTGGCAAGAGTGAGG | 60 |
| <b><i>MYH7</i></b>       | ACCTGTCCAAGTCCGCAAGG    | TTTGCTGGCACCTCCAGGG    | 60 |
